# Supplementary material for: ARHGEF2 Isoform Switching Couples Intestinal Epithelial Barrier Function with Autophagic Response to Pathogens
Source: Research Square preprint supplement (doi:10.21203/rs.3.rs-8252764/v1), 2025-12-11
Supplement: Supplementary file 1 [file 2e1493595655635f1eb8e5fe.xlsx]

## Sheet: PeptideGroups
Confidence	Sequence	Modifications	# Protein Groups	# Proteins	# PSMs	Master Protein Accessions
High	MSRIESLTR	1xMet-loss+Acetyl [N-Term]	1	3	1	Arhgef2-201 peptide
High	VVQQERLMEALFPEGPERWEKLS	1xOxidation [M8]	1	8	1	Arhgef2-201 peptide
High	IKTKLQQK		1	8	1	Arhgef2-201 peptide
High	LLEREAEEI		1	8	1	Arhgef2-201 peptide
High	LLEREAEEIRRQLAALGQNEPLPA		1	8	1	Arhgef2-201 peptide
High	LLKDALREVEGLKDLLLGPCVDLPMTS	1xCarbamidomethyl [C20]; 1xOxidation [M25]	1	8	1	Arhgef2-201 peptide
High	LINLYGLLHGLQAV		1	8	1	Arhgef2-201 peptide
High	LLQRQHTLLQEELRR		1	8	1	Arhgef2-201 peptide
High	LMEALFPEGPERWEKL	1xOxidation [M2]	1	8	1	Arhgef2-201 peptide
High	LMEALFPEGPERWEKLS	1xOxidation [M2]	1	8	1	Arhgef2-201 peptide
High	INLYGLLHGLQA		1	8	1	Arhgef2-201 peptide
High	INLYGLLHGLQAVV		1	8	1	Arhgef2-201 peptide
High	INLYGLLHGLQAVVV		1	8	1	Arhgef2-201 peptide
High	INLYGLLHGLQAVVVQQER		1	8	1	Arhgef2-201 peptide
High	INLYGLLHGLQAVVVQQERLMEA	1xOxidation [M21]	1	8	1	Arhgef2-201 peptide
High	LQQKNQALVELLQKNVELFAEMV	1xOxidation [M22]	1	8	1	Arhgef2-201 peptide
High	LYGLLHGLQAV		1	8	1	Arhgef2-201 peptide
High	SPQEEVLQPL		1	8	1	Arhgef2-201 peptide
High	MQDIPEETESRDGEPT		1	8	2	Arhgef2-201 peptide
High	MQDIPEETESRDGEPT	1xOxidation [M1]	1	8	4	Arhgef2-201 peptide
High	MQDIPEETESRDGEPTASES	1xOxidation [M1]	1	8	1	Arhgef2-201 peptide
High	NGNQLRSPQEEVLQPL		1	8	1	Arhgef2-201 peptide
High	NGNQLRSPQEEVLQPLINLYGLLHGLQAV		1	8	1	Arhgef2-201 peptide
High	NQALVELLQKNVELF		1	8	1	Arhgef2-201 peptide
High	PEGPERWEKLS		1	8	1	Arhgef2-201 peptide
High	QKNVELFAEMV	1xOxidation [M10]	1	8	3	Arhgef2-201 peptide
High	RADSDSSQKDR		1	8	1	Arhgef2-201 peptide
High	REPALPLDSDSG		1	8	1	Arhgef2-201 peptide
High	REPALPLDSDSGSCPGVT	1xCarbamidomethyl [C14]	1	8	4	Arhgef2-201 peptide
High	REPALPLDSDSGSCPGVTA	1xCarbamidomethyl [C14]	1	8	2	Arhgef2-201 peptide
High	RQLAALGQNEPLPA		1	8	1	Arhgef2-201 peptide
High	SPQEEVLQPLINLYGLLHGLQAV		1	8	1	Arhgef2-201 peptide
High	KDLLLGPCVDLPMTS	1xCarbamidomethyl [C8]; 1xOxidation [M13]	1	8	2	Arhgef2-201 peptide
High	INLYGLLHGLQAV		1	8	2	Arhgef2-201 peptide
High	EGPERWEKLSRANSRDGEAG		1	8	1	Arhgef2-201 peptide
High	ELLQKNVELFAEMV	1xOxidation [M13]	1	8	1	Arhgef2-201 peptide
High	EGLKDLLLGPCVDLPMTS	1xCarbamidomethyl [C11]; 1xOxidation [M16]	1	8	1	Arhgef2-201 peptide
High	TPEKQATELA		1	8	1	Arhgef2-201 peptide
High	GFVGMPPPALPR		1	8	2	Arhgef2-201 peptide
High	GFVGMPPPALPR	1xOxidation [M5]	1	8	6	Arhgef2-201 peptide
High	SVTPEKQATELA		1	8	1	Arhgef2-201 peptide
High	GSPEDRLQDSSDPDTGSEEEV		1	8	1	Arhgef2-201 peptide
High	ALLEREAEEIRR		1	8	1	Arhgef2-201 peptide
High	ALLEREAEEI		1	8	1	Arhgef2-201 peptide
High	DALREVEGLKDLLLGPCVDLPMTS	1xCarbamidomethyl [C17]; 1xOxidation [M22]	1	8	1	Arhgef2-201 peptide
High	EVEGLKDLLLGPCVDLPMTS	1xCarbamidomethyl [C13]; 1xOxidation [M18]	1	8	1	Arhgef2-201 peptide
High	AEEIRRQLAALGQNEPLPAE		1	8	1	Arhgef2-201 peptide
High	GSPEDRLQDSSDPDTGSEEEVS		1	8	1	Arhgef2-201 peptide
High	ELLSNVDQDVHELEKEAR		1	9	1	Arhgef2-201 peptide
High	ELLSNVDQDVHELEKEA		1	9	1	Arhgef2-201 peptide
High	SLQNLIVRDIANQAK		1	9	1	Arhgef2-201 peptide
High	SALGLVKELLS		1	9	2	Arhgef2-201 peptide
High	SHGVEEEYQDLA		1	9	1	Arhgef2-201 peptide
High	SLQNLIVRDIANQA		1	9	3	Arhgef2-201 peptide
High	NMRNRTLSVESLIDEGVEVFYNELMSDFEMDE	1xOxidation [M25]	1	9	1	Arhgef2-201 peptide
High	DRNGNQLR		1	9	1	Arhgef2-201 peptide
High	NRILQNSHGVEEEYQ		1	9	1	Arhgef2-201 peptide
High	NRILQNSHGVEEEYQDLA		1	9	2	Arhgef2-201 peptide
High	NRILQNSHGVEEEYQDLAS		1	9	2	Arhgef2-201 peptide
High	RSLPAGDALYLS		1	9	1	Arhgef2-201 peptide
High	NRTLSVESLIDEGVEV		1	9	8	Arhgef2-201 peptide
High	RSLPAGDALYL		1	9	1	Arhgef2-201 peptide
High	RSLPAGDALY		1	9	1	Arhgef2-201 peptide
High	NVDQDVHELEKEAR		1	9	1	Arhgef2-201 peptide
High	ELLSNVDQDVHELEKEARLQEI		1	9	1	Arhgef2-201 peptide
High	QFSGSNAEQMR		1	9	1	Arhgef2-201 peptide
High	QFSGSNAEQMRK		1	9	1	Arhgef2-201 peptide
High	QFSGSNAEQMRKT		1	9	1	Arhgef2-201 peptide
High	QNLIVRDIANQA		1	9	1	Arhgef2-201 peptide
High	QQSVRLCPSREDFPLIETEDKA	1xCarbamidomethyl [C7]	1	9	1	Arhgef2-201 peptide
High	REDFPLIETEDKA		1	9	2	Arhgef2-201 peptide
High	RILQNSHGVEEEYQDLA		1	9	1	Arhgef2-201 peptide
High	SLDKPSVV		1	9	1	Arhgef2-201 peptide
High	SALGLVKELLSNVDQDVH		1	9	1	Arhgef2-201 peptide
High	ITKYPVLI		1	9	1	Arhgef2-201 peptide
High	LIHEGCLLWKT	1xCarbamidomethyl [C6]	1	9	1	Arhgef2-201 peptide
High	SSGPPEMYEVHAA		1	9	1	Arhgef2-201 peptide
High	GLVKELLSNVDQDVHELEKEA		1	9	1	Arhgef2-201 peptide
High	ITKYPVLIN		1	9	1	Arhgef2-201 peptide
High	LGEERATEAGSLEA		1	9	3	Arhgef2-201 peptide
High	LFRTGMLEELQMEPEVV	2xOxidation [M6; M12]	1	9	2	Arhgef2-201 peptide
High	ILQNSHGVEEEYQDLA		1	9	2	Arhgef2-201 peptide
High	LCPSREDFPLIETEDKA	1xCarbamidomethyl [C2]	1	9	1	Arhgef2-201 peptide
High	KLIHEGCLLWKT	1xCarbamidomethyl [C7]	1	9	1	Arhgef2-201 peptide
High	KGPFGRDELLR		1	9	1	Arhgef2-201 peptide
High	KGMFLISSGPPEMYEVHAA	2xOxidation [M3; M13]	1	9	1	Arhgef2-201 peptide
High	KGMFLISSGPPEMYEVH	2xOxidation [M3; M13]	1	9	1	Arhgef2-201 peptide
High	KELLSNVDQDVHELEKEAR		1	9	1	Arhgef2-201 peptide
High	KELLSNVDQDVHELEKEA		1	9	1	Arhgef2-201 peptide
High	KQATELALLQ		1	9	1	Arhgef2-201 peptide
High	FTSLDKPSVV		1	9	1	Arhgef2-201 peptide
High	LGEERATEAGSLEAR		1	9	1	Arhgef2-201 peptide
High	FNGSIELCR	1xCarbamidomethyl [C8]	1	9	1	Arhgef2-201 peptide
High	SALGLVKELLSNV		1	9	1	Arhgef2-201 peptide
High	LSNVDQDVHELEKEA		1	9	1	Arhgef2-201 peptide
High	FLNQLLER		1	9	1	Arhgef2-201 peptide
High	LQNSHGVEEEYQDLAS		1	9	1	Arhgef2-201 peptide
High	LQNSHGVEEEYQDLA		1	9	1	Arhgef2-201 peptide
High	FNGSIELCRA	1xCarbamidomethyl [C8]	1	9	1	Arhgef2-201 peptide
High	TFNGSIELCRA	1xCarbamidomethyl [C9]	1	9	3	Arhgef2-201 peptide
High	VLKRHGVQECI	1xCarbamidomethyl [C10]	1	10	1	Arhgef2-201 peptide
High	HGVQECI	1xCarbamidomethyl [C6]	1	10	1	Arhgef2-201 peptide
High	RLQEIYNR		1	10	1	Arhgef2-201 peptide
High	KQDVIYELI		1	10	1	Arhgef2-201 peptide
High	ALKLYKELYAR		1	10	1	Arhgef2-201 peptide
High	KQDVIYELIQT		1	10	1	Arhgef2-201 peptide
High	KQDVIYELIQTELHHV		1	10	1	Arhgef2-201 peptide
High	NFVIHRLGDLLIS		1	10	3	Arhgef2-201 peptide
High	HGVQECILLV	1xCarbamidomethyl [C6]	1	10	1	Arhgef2-201 peptide
High	QNLIVRDI		1	10	1	Arhgef2-201 peptide
High	QALCPGSTR	1xCarbamidomethyl [C4]	1	10	1	Arhgef2-201 peptide
High	SLQNLIVRDI		1	10	5	Arhgef2-201 peptide
High	QGLFPCVDELSDIHTR	1xCarbamidomethyl [C6]	1	10	1	Arhgef2-201 peptide
High	QGLFPCVDELSDIHTRFL	1xCarbamidomethyl [C6]	1	10	1	Arhgef2-201 peptide
High	VDSSFLQQHKKEVMK		1	11	1	Arhgef2-201 peptide
High	NDESPLGLRQILSQSTDSL		1	12	1	Arhgef2-201 peptide
High	FNDESPLGLRQILSQST		1	12	1	Arhgef2-201 peptide
High	FNDESPLGLRQI		1	12	1	Arhgef2-201 peptide
High	RQILSQSTDSLNMR		1	12	1	Arhgef2-201 peptide
High	QILSQSTDSLNMR		1	12	1	Arhgef2-201 peptide
High	GLRQILSQSTDSL		1	12	2	Arhgef2-201 peptide
High	QILSQSTDSLNMR	1xOxidation [M12]	1	12	1	Arhgef2-201 peptide
High	NIAGHFNDESPLGLRQI		1	12	1	Arhgef2-201 peptide
High	FNDESPLGLRQILSQSTDSL		1	12	1	Arhgef2-201 peptide
High	VDSSFLQQHKK		1	12	2	Arhgef2-201 peptide
High	RQILSQSTDSL		1	12	1	Arhgef2-201 peptide
High	LSQSTDSLNMR	1xOxidation [M10]	1	13	1	Arhgef2-201 peptide
High	FNDESPLGLR		1	13	1	Arhgef2-201 peptide
High	NIAGHFNDESPLGL		1	13	1	Arhgef2-201 peptide
High	NIAGHFNDESPL		1	13	2	Arhgef2-201 peptide
High	NDESPLGLR		1	13	1	Arhgef2-201 peptide
High	GHFNDESPLGLR		1	13	1	Arhgef2-201 peptide
High	GHFNDESPLGL		1	13	1	Arhgef2-201 peptide
High	SAIYPSDSFRQSLL		1	14	1	Arhgef2-201 peptide
High	SAIYPSDSFRQSLLG		1	14	1	Arhgef2-201 peptide
High	IYPSDSFRQSLL		1	14	1	Arhgef2-201 peptide
High	SAIYPSDSFR		1	15	1	Arhgef2-201 peptide
High	ALLRNNTALQSV		1	16	2	Arhgef2-201 peptide
High	AALLRNNTALQSV		1	16	1	Arhgef2-201 peptide
High	RNNTALQSV		1	16	1	Arhgef2-201 peptide
High	EAKDARYTNGHLFT		1	17	1	Arhgef2-201 peptide
High	CKDTLANCT	2xCarbamidomethyl [C1; C8]	1	17	1	Arhgef2-201 peptide
High	RYTNGHLFTTI		1	17	1	Arhgef2-201 peptide
High	KVKQKQQKA		1	17	1	Arhgef2-201 peptide
