# Supplementary material for: ARHGEF2 Isoform Switching Couples Intestinal Epithelial Barrier Function with Autophagic Response to Pathogens
Source: Research Square preprint supplement (doi:10.21203/rs.3.rs-8252764/v1), 2025-12-11
Supplement: Supplementary file 1 [file a728949273c10f53a7e7b301.pdf]

## List of Supplementary Information:

### 1. Supplementary Data Tables

Supplementary Table 1 (presented as an excel file)

Peptides detected by Mass-spectrometry after immunoprecipitation with ABs detecting amnio acid 57-76 of Arhgef2-207 in primary intestinal epithelial cells.

Supplementary Table 2 (presented as an excel file)

Peptides detected by Mass-spectrometry after immunoprecipitation with ABs detecting amnio acid 656-1000 of Arhgef2-201 in primary macrophages.

Supplementary Table 3 (presented as an excel file)

DESeq2 analysis of genes differentially regulated in small intestinal epithelial cells isolated from *Arhgef2*<sup>207<sup>vilc</sup></sup> and *Arhgef2*<sup>207<sup>cKO</sup></sup>.

Supplementary Table 4 (presented as an excel file)

Quantification of infection-induced changes in Pol II loading at promoters. Promoter-specific Pol II CUT&Tag signal (mean  $\pm$  s.e.m.) across ARHGEF2-associated promoters (P1–P2) and CXCL8 and PHDLA1 in control and *Listeria*-infected organoids, together with Welch's *t*-test statistics, fold-change values, and log<sub>2</sub>FC estimates.

Supplementary Table 5

Key resources table
