# Supplementary material for: ARHGEF2 Isoform Switching Couples Intestinal Epithelial Barrier Function with Autophagic Response to Pathogens
Source: Research Square preprint supplement (doi:10.21203/rs.3.rs-8252764/v1), 2025-12-11
Supplement: Supplementary file 2 [file aabf0603cddcacc5eabfe862.xlsx]

## Sheet: Annotated Probe Report for auto
Probe	Chromosome	Start	End	Probe Strand	Feature	ID	Description	Feature Strand	Type	Feature Orientation	Distance	z score (autophagosome organization TAM207 vs 207)	207IECfemale	207IECTAMfemale	528-tam_trimmedAligned.sortedByCoord.out.bam	529-tam_trimmedAligned.sortedByCoord.out.bam	295-CTL_trimmedAligned.sortedByCoord.out.bam	527-CTL_trimmedAligned.sortedByCoord.out.bam
Ubxn2a	12	4879032	4907705	-	Ubxn2a	ENSMUSG00000020634	UBX domain protein 2A [Source:MGI Symbol;Acc:MGI:2442310]	-	gene	Name match	0	-2.17004	1800.5	3275	3614	2936	1324	2277
Pink1	4	138313409	138326307	-	Pink1	ENSMUSG00000028756	PTEN induced putative kinase 1 [Source:MGI Symbol;Acc:MGI:1916193]	-	gene	Name match	0	-1.67813	2590.5	4339	4948	3730	1886	3295
Atg3	16	45158785	45188538	+	Atg3	ENSMUSG00000022663	autophagy related 3 [Source:MGI Symbol;Acc:MGI:1915091]	+	gene	Name match	0	-1.53827	904	1377.5	1457	1298	703	1105
Snx7	3	117781647	117868936	-	Snx7	ENSMUSG00000028007	sorting nexin 7 [Source:MGI Symbol;Acc:MGI:1923811]	-	gene	Name match	0	-1.32896	1559.5	2200	2416	1984	1141	1978
Ralb	1	119470305	119504794	-	Ralb	ENSMUSG00000004451	v-ral simian leukemia viral oncogene B [Source:MGI Symbol;Acc:MGI:1927244]	-	gene	Name match	0	-1.3266	1396	1954.5	1923	1986	1103	1689
Atg9a	1	75180860	75192196	-	Atg9a	ENSMUSG00000033124	autophagy related 9A [Source:MGI Symbol;Acc:MGI:2138446]	-	gene	Name match	0	-1.31876	2758	4098.5	4290	3907	2385	3131
Snx4	16	33251442	33300269	+	Snx4	ENSMUSG00000022808	sorting nexin 4 [Source:MGI Symbol;Acc:MGI:1916400]	+	gene	Name match	0	-1.29788	1779.5	2659	2684	2634	1525	2034
Tom1	8	75033705	75070121	+	Tom1	ENSMUSG00000042870	target of myb1 trafficking protein [Source:MGI Symbol;Acc:MGI:1338026]	+	gene	Name match	0	-1.24961	259.5	432	430	434	187	332
Fez2	17	78369212	78418152	-	Fez2	ENSMUSG00000056121	fasciculation and elongation protein zeta 2 (zygin II) [Source:MGI Symbol;Acc:MGI:2675856]	-	gene	Name match	0	-1.10486	1344	1872.5	2057	1688	1187	1501
Rab3gap2	1	185204117	185286759	+	Rab3gap2	ENSMUSG00000039318	RAB3 GTPase activating protein subunit 2 [Source:MGI Symbol;Acc:MGI:1916043]	+	gene	Name match	0	-0.990624	1783	2467.5	2732	2203	1505	2061
Sh3glb1	3	144683678	144720335	-	Sh3glb1	ENSMUSG00000037062	SH3-domain GRB2-like B1 (endophilin) [Source:MGI Symbol;Acc:MGI:1859730]	-	gene	Name match	0	-0.950967	2416	3150	3186	3114	1932	2900
Lrba	3	86224680	86782692	+	Lrba	ENSMUSG00000028080	LPS-responsive beige-like anchor [Source:MGI Symbol;Acc:MGI:1933162]	+	gene	Name match	0	-0.884497	3084.5	4026.5	4563	3490	3141	3028
Pip4k2c	10	127197067	127211585	-	Pip4k2c	ENSMUSG00000025417	phosphatidylinositol-5-phosphate 4-kinase, type II, gamma [Source:MGI Symbol;Acc:MGI:2152214]	-	gene	Name match	0	-0.853771	1869	2464.5	2594	2335	1468	2270
Rab43	6	87788853	87812164	-	Rab43	ENSMUSG00000030055	RAB43, member RAS oncogene family [Source:MGI Symbol;Acc:MGI:1917084]	-	gene	Name match	0	-0.836594	2462.5	3109	3566	2652	2235	2690
Rab1a	11	20201432	20226856	+	Rab1a	ENSMUSG00000020149	RAB1A, member RAS oncogene family [Source:MGI Symbol;Acc:MGI:97842]	+	gene	Name match	0	-0.793879	9143.5	13527	14329	12725	8202	10085
Map1lc3a	2	155276297	155278073	+	Map1lc3a	ENSMUSG00000027602	microtubule-associated protein 1 light chain 3 alpha [Source:MGI Symbol;Acc:MGI:1915661]	+	gene	Name match	0	-0.771001	201.5	272.5	285	260	96	307
Mtor	4	148448611	148557683	+	Mtor	ENSMUSG00000028991	mechanistic target of rapamycin kinase [Source:MGI Symbol;Acc:MGI:1928394]	+	gene	Name match	0	-0.689663	1066.5	1291.5	1516	1067	1065	1068
Tmem41b	7	109972187	109986929	-	Tmem41b	ENSMUSG00000047554	transmembrane protein 41B [Source:MGI Symbol;Acc:MGI:1289225]	-	gene	Name match	0	-0.688751	1818	2217	2145	2289	1357	2279
Gabarapl1	6	129533160	129542346	+	Gabarapl1	ENSMUSG00000030161	gamma-aminobutyric acid (GABA) A receptor- associated protein-like 1 [Source:MGI Symbol;Acc:MGI:1914980]	+	gene	Name match	0	-0.665677	201	261.5	335	188	141	261
Mfn2	4	147873599	147904704	-	Mfn2	ENSMUSG00000029020	mitofusin 2 [Source:MGI Symbol;Acc:MGI:2442230]	-	gene	Name match	0	-0.644715	4144	5088.5	5700	4477	4096	4192
Rab7	6	87999106	88045270	-	Rab7	ENSMUSG00000079477	RAB7, member RAS oncogene family [Source:MGI Symbol;Acc:MGI:105068]	-	gene	Name match	0	-0.625832	3997.5	4872	5123	4621	3448	4547
Ulk2	11	61775649	61855073	-	Ulk2	ENSMUSG00000004798	unc-51 like kinase 2 [Source:MGI Symbol;Acc:MGI:1352758]	-	gene	Name match	0	-0.568496	415	504.5	547	462	363	467
Stx12	4	132853501	132884509	-	Stx12	ENSMUSG00000028879	syntaxin 12 [Source:MGI Symbol;Acc:MGI:1931027]	-	gene	Name match	0	-0.564397	3172	3763.5	4163	3364	2724	3620
Atg2a	19	6241668	6262335	+	Atg2a	ENSMUSG00000024773	autophagy related 2A [Source:MGI Symbol;Acc:MGI:1916291]	+	gene	Name match	0	-0.551781	1568.5	1797	2042	1552	1300	1837
Gabarap	11	69991143	69994951	+	Gabarap	ENSMUSG00000018567	gamma-aminobutyric acid receptor associated protein [Source:MGI Symbol;Acc:MGI:1861742]	+	gene	Name match	0	-0.545883	5656	6792	6780	6804	4096	7216
Atg13	2	91674618	91710576	-	Atg13	ENSMUSG00000027244	autophagy related 13 [Source:MGI Symbol;Acc:MGI:1196429]	-	gene	Name match	0	-0.513037	1143.5	1329	1484	1174	871	1416
Ctsd	7	142375911	142388038	-	Ctsd	ENSMUSG00000007891	cathepsin D [Source:MGI Symbol;Acc:MGI:88562]	-	gene	Name match	0	-0.494998	5347.5	6264	7061	5467	4018	6677
Rab1b	19	5099205	5107072	-	Rab1b	ENSMUSG00000024870	RAB1B, member RAS oncogene family [Source:MGI Symbol;Acc:MGI:1923558]	-	gene	Name match	0	-0.487068	4092	4773.5	4906	4641	3183	5001
Pacs2	12	113014508	113074401	+	Pacs2	ENSMUSG00000021143	phosphofurin acidic cluster sorting protein 2 [Source:MGI Symbol;Acc:MGI:1924399]	+	gene	Name match	0	-0.479344	677	778.5	916	641	555	799
Becn1	11	101285952	101302286	-	Becn1	ENSMUSG00000035086	beclin 1, autophagy related [Source:MGI Symbol;Acc:MGI:1891828]	-	gene	Name match	0	-0.476268	3389.5	3900	4515	3285	2636	4143
Psen1	12	83688152	83735199	+	Psen1	ENSMUSG00000019969	presenilin 1 [Source:MGI Symbol;Acc:MGI:1202717]	+	gene	Name match	0	-0.467056	3443.5	3948	4199	3697	2972	3915
Atg4b	1	93751500	93790610	+	Atg4b	ENSMUSG00000026280	autophagy related 4B, cysteine peptidase [Source:MGI Symbol;Acc:MGI:1913865]	+	gene	Name match	0	-0.46613	1014.5	1144.5	1254	1035	762	1267
Snx18	13	113592179	113618564	-	Snx18	ENSMUSG00000042364	sorting nexin 18 [Source:MGI Symbol;Acc:MGI:2137642]	-	gene	Name match	0	-0.412707	575.5	655	789	521	443	708
Sec22b	3	97901190	97923276	+	Sec22b	ENSMUSG00000027879	SEC22 homolog B, vesicle trafficking protein [Source:MGI Symbol;Acc:MGI:1338759]	+	gene	Name match	0	-0.408034	2624	2939	3068	2810	2365	2883
Atg14	14	47540893	47570649	-	Atg14	ENSMUSG00000037526	autophagy related 14 [Source:MGI Symbol;Acc:MGI:1261775]	-	gene	Name match	0	-0.381513	372	422	525	319	255	489
Traf6	2	101678429	101701669	+	Traf6	ENSMUSG00000027164	TNF receptor-associated factor 6 [Source:MGI Symbol;Acc:MGI:108072]	+	gene	Name match	0	-0.368941	480.5	553	574	532	440	521
Map1lc3b	8	121590361	121598760	+	Map1lc3b	ENSMUSG00000031812	microtubule-associated protein 1 light chain 3 beta [Source:MGI Symbol;Acc:MGI:1914693]	+	gene	Name match	0	-0.340099	1839	2027.5	2243	1812	1155	2523
Atg7	6	114643097	114860614	+	Atg7	ENSMUSG00000030314	autophagy related 7 [Source:MGI Symbol;Acc:MGI:1921494]	+	gene	Name match	0	-0.323823	487.5	550.5	620	481	358	617
Gabarapl2	8	111940703	111953612	+	Gabarapl2	ENSMUSG00000031950	gamma-aminobutyric acid (GABA) A receptor- associated protein-like 2 [Source:MGI Symbol;Acc:MGI:1890602]	+	gene	Name match	0	-0.317533	1379	1516	1614	1418	955	1803
Atg4a	X	140956907	141164270	+	Atg4a	ENSMUSG00000079418	autophagy related 4A, cysteine peptidase [Source:MGI Symbol;Acc:MGI:2147903]	+	gene	Name match	0	-0.313859	396.5	443.5	482	405	311	482
Mtmr3	11	4480868	4594863	-	Mtmr3	ENSMUSG00000034354	myotubularin related protein 3 [Source:MGI Symbol;Acc:MGI:1921552]	-	gene	Name match	0	-0.29701	1453	1595	1761	1429	1246	1660
Smurf1	5	144876495	144965847	-	Smurf1	ENSMUSG00000038780	SMAD specific E3 ubiquitin protein ligase 1 [Source:MGI Symbol;Acc:MGI:1923038]	-	gene	Name match	0	-0.291757	587.5	643.5	651	636	534	641
Atg2b	12	105616136	105685211	-	Atg2b	ENSMUSG00000041341	autophagy related 2B [Source:MGI Symbol;Acc:MGI:1923809]	-	gene	Name match	0	-0.272172	911	982	1224	740	823	999
Rab33b	3	51483920	51496232	+	Rab33b	ENSMUSG00000027739	RAB33B, member RAS oncogene family [Source:MGI Symbol;Acc:MGI:1330805]	+	gene	Name match	0	-0.267356	359.5	393	426	360	313	406
Efnb1	X	99136130	99148991	+	Efnb1	ENSMUSG00000031217	ephrin B1 [Source:MGI Symbol;Acc:MGI:102708]	+	gene	Name match	0	-0.260602	2591	2785	3252	2318	2276	2906
Rnf5	17	34601091	34603690	-	Rnf5	ENSMUSG00000015478	ring finger protein 5 [Source:MGI Symbol;Acc:MGI:1860076]	-	gene	Name match	0	-0.23787	2441.5	2599.5	2657	2542	2020	2863
Atp2a2	5	122453513	122502225	-	Atp2a2	ENSMUSG00000029467	ATPase, Ca++ transporting, cardiac muscle, slow twitch 2 [Source:MGI Symbol;Acc:MGI:88110]	-	gene	Name match	0	-0.231676	6089.5	6582.5	7548	5617	5799	6380
Atg4c	4	99193934	99259787	+	Atg4c	ENSMUSG00000028550	autophagy related 4C, cysteine peptidase [Source:MGI Symbol;Acc:MGI:2651854]	+	gene	Name match	0	-0.22808	473.5	513	548	478	415	532
Synpo2	3	123076519	123236149	-	Synpo2	ENSMUSG00000050315	synaptopodin 2 [Source:MGI Symbol;Acc:MGI:2153070]	-	gene	Name match	0	-0.205285	0.5	1.5	3	0	0	1
Scfd1	12	51377510	51450101	+	Scfd1	ENSMUSG00000020952	Sec1 family domain containing 1 [Source:MGI Symbol;Acc:MGI:1924233]	+	gene	Name match	0	-0.20297	1708	1797.5	1842	1753	1377	2039
Smcr8	11	60777524	60788287	+	Smcr8	ENSMUSG00000049323	Smith-Magenis syndrome chromosome region, candidate 8 homolog (human) [Source:MGI Symbol;Acc:MGI:2444720]	+	gene	Name match	0	-0.197638	787	834	1030	638	716	858
Atg101	15	101284272	101290945	+	Atg101	ENSMUSG00000037204	autophagy related 101 [Source:MGI Symbol;Acc:MGI:1915368]	+	gene	Name match	0	-0.187479	412	441	492	390	299	525
Ubqln1	13	58176156	58215653	-	Ubqln1	ENSMUSG00000005312	ubiquilin 1 [Source:MGI Symbol;Acc:MGI:1860276]	-	gene	Name match	0	-0.169692	2741	2872.5	3266	2479	2387	3095
Ambra1	2	91730134	91918849	+	Ambra1	ENSMUSG00000040506	autophagy/beclin 1 regulator 1 [Source:MGI Symbol;Acc:MGI:2443564]	+	gene	Name match	0	-0.160247	1167.5	1221	1350	1092	908	1427
Irgm1	11	48861968	48871683	-	Irgm1	ENSMUSG00000046879	immunity-related GTPase family M member 1 [Source:MGI Symbol;Acc:MGI:107567]	-	gene	Name match	0	-0.147459	1068	1109	971	1247	1042	1094
Phf23	11	69995777	70000009	+	Phf23	ENSMUSG00000018572	PHD finger protein 23 [Source:MGI Symbol;Acc:MGI:1925496]	+	gene	Name match	0	-0.144722	836.5	870	964	776	626	1047
Pik3c3	18	30272747	30348126	+	Pik3c3	ENSMUSG00000033628	phosphatidylinositol 3-kinase catalytic subunit type 3 [Source:MGI Symbol;Acc:MGI:2445019]	+	gene	Name match	0	-0.130192	773.5	803	877	729	654	893
Atg12	18	46730144	46741580	-	Atg12	ENSMUSG00000032905	autophagy related 12 [Source:MGI Symbol;Acc:MGI:1914776]	-	gene	Name match	0	-0.11394	873.5	901	1107	695	693	1054
Rab19	6	39381175	39390380	+	Rab19	ENSMUSG00000029923	RAB19, member RAS oncogene family [Source:MGI Symbol;Acc:MGI:103292]	+	gene	Name match	0	-0.0802767	429.5	442	432	452	323	536
Mtm1	X	71210767	71315691	+	Mtm1	ENSMUSG00000031337	X-linked myotubular myopathy gene 1 [Source:MGI Symbol;Acc:MGI:1099452]	+	gene	Name match	0	-0.0614776	1217	1239	1167	1311	1057	1377
Atg4d	9	21265293	21277772	+	Atg4d	ENSMUSG00000002820	autophagy related 4D, cysteine peptidase [Source:MGI Symbol;Acc:MGI:2444308]	+	gene	Name match	0	0.00871429	3234.5	3226.5	3419	3034	2376	4093
Nsfl1c	2	151494182	151511414	+	Nsfl1c	ENSMUSG00000027455	NSFL1 (p97) cofactor (p47) [Source:MGI Symbol;Acc:MGI:3042273]	+	gene	Name match	0	0.023943431675434113	1387.5	1378	1474	1282	1148	1627
Ift20	11	78536361	78541737	+	Ift20	ENSMUSG00000001105	intraflagellar transport 20 [Source:MGI Symbol;Acc:MGI:1915585]	+	gene	Name match	0	0.054475508630275726	1805	1780	1957	1603	1435	2175
Tbc1d14	5	36490604	36593276	-	Tbc1d14	ENSMUSG00000029192	TBC1 domain family, member 14 [Source:MGI Symbol;Acc:MGI:1098708]	-	gene	Name match	0	0.0551634	2015.5	1983.5	2297	1670	1884	2147
Wdr45b	11	121327224	121354445	-	Wdr45b	ENSMUSG00000025173	WD repeat domain 45B [Source:MGI Symbol;Acc:MGI:1914090]	-	gene	Name match	0	0.0670178	861.5	846	902	790	648	1075
Trp53inp1	4	11156431	11174379	+	Trp53inp1	ENSMUSG00000028211	transformation related protein 53 inducible nuclear protein 1 [Source:MGI Symbol;Acc:MGI:1926609]	+	gene	Name match	0	0.13744354248046875	326.5	309.5	321	298	215	438
Tbc1d12	19	38836579	38919923	+	Tbc1d12	ENSMUSG00000048720	TBC1D12: TBC1 domain family, member 12 [Source:MGI Symbol;Acc:MGI:2384803]	+	gene	Name match	0	0.13914628326892853	122.5	114	144	84	93	152
Rab3gap1	1	127868773	127943868	+	Rab3gap1	ENSMUSG00000036104	RAB3 GTPase activating protein subunit 1 [Source:MGI Symbol;Acc:MGI:2445001]	+	gene	Name match	0	0.16704154014587402	970	927	1186	668	895	1045
Igtp	11	58199556	58207591	+	Igtp	ENSMUSG00000078853	interferon gamma induced GTPase [Source:MGI Symbol;Acc:MGI:107729]	+	gene	Name match	0	0.17245018482208252	2090.5	1990	2184	1796	2561	1620
Rb1cc1	1	6206197	6276648	+	Rb1cc1	ENSMUSG00000025907	RB1-inducible coiled-coil 1 [Source:MGI Symbol;Acc:MGI:1341850]	+	gene	Name match	0	0.17633400857448578	1179.5	1125	1334	916	1053	1306
Ulk1	5	110784488	110810097	-	Ulk1	ENSMUSG00000029512	unc-51 like kinase 1 [Source:MGI Symbol;Acc:MGI:1270126]	-	gene	Name match	0	0.17891554534435272	589.5	559	656	462	523	656
Pikfyve	1	65186683	65278695	+	Pikfyve	ENSMUSG00000025949	phosphoinositide kinase, FYVE type zinc finger containing [Source:MGI Symbol;Acc:MGI:1335106]	+	gene	Name match	0	0.2082553505897522	432.5	402	479	325	414	451
Wdr45	X	7714333	7728206	+	Wdr45	ENSMUSG00000039382	WD repeat domain 45 [Source:MGI Symbol;Acc:MGI:1859606]	+	gene	Name match	0	0.25073370337486267	479.5	440	530	350	337	622
Irgm2	11	58199618	58222782	+	Irgm2	ENSMUSG00000069874	immunity-related GTPase family M member 2 [Source:MGI Symbol;Acc:MGI:1926262]	+	gene	Name match	0	0.2558225691318512	1219	1135.5	1147	1124	1403	1035
Arfip2	7	105634203	105640416	-	Arfip2	ENSMUSG00000030881	ADP-ribosylation factor interacting protein 2 [Source:MGI Symbol;Acc:MGI:1924182]	-	gene	Name match	0	0.26178425550460815	1264.5	1171.5	1270	1073	949	1580
Ehmt2	17	34898469	34914052	+	Ehmt2	ENSMUSG00000013787	euchromatic histone lysine N- methyltransferase 2 [Source:MGI Symbol;Acc:MGI:2148922]	+	gene	Name match	0	0.3879254460334778	3699	3287.5	3931	2644	3038	4360
Atg16l2	7	101263034	101302251	-	Atg16l2	ENSMUSG00000047767	autophagy related 16-like 2 (S. cerevisiae) [Source:MGI Symbol;Acc:MGI:1920933]	-	gene	Name match	0	0.3902167081832886	84.5	68.5	89	48	41	128
Atg4a-ps	3	103643954	103646068	-	Atg4a-ps	ENSMUSG00000087119	autophagy related 4A, pseudogene [Source:MGI Symbol;Acc:MGI:3615624]	-	gene	Name match	0	0.4105693995952606	3	1	1	1	1	5
Atg5	10	44268358	44364291	+	Atg5	ENSMUSG00000038160	autophagy related 5 [Source:MGI Symbol;Acc:MGI:1277186]	+	gene	Name match	0	0.41592174768447876	890.5	793	920	666	751	1030
Wipi2	5	142627698	142670588	+	Wipi2	ENSMUSG00000029578	WD repeat domain, phosphoinositide interacting 2 [Source:MGI Symbol;Acc:MGI:1923831]	+	gene	Name match	0	0.4544556736946106	1453	1276	1465	1087	1209	1697
Atg16l1	1	87755870	87792428	+	Atg16l1	ENSMUSG00000026289	autophagy related 16-like 1 (S. cerevisiae) [Source:MGI Symbol;Acc:MGI:1924290]	+	gene	Name match	0	0.5467803478240967	567	461.5	522	401	458	676
Epm2a	10	11343404	11459644	+	Epm2a	ENSMUSG00000055493	epilepsy, progressive myoclonic epilepsy, type 2 gene alpha [Source:MGI Symbol;Acc:MGI:1341085]	+	gene	Name match	0	0.5788166522979736	10	6	6	6	10	10
Emc6	11	73175519	73177037	-	Emc6	ENSMUSG00000047260	ER membrane protein complex subunit 6 [Source:MGI Symbol;Acc:MGI:1913298]	-	gene	Name match	0	0.5876163840293884	624.5	521.5	511	532	397	852
Ulk3	9	57589452	57596233	+	Ulk3	ENSMUSG00000032308	unc-51-like kinase 3 [Source:MGI Symbol;Acc:MGI:1918992]	+	gene	Name match	0	0.6505169868469238	439	354	405	303	371	507
