# Supplementary material for: ARHGEF2 Isoform Switching Couples Intestinal Epithelial Barrier Function with Autophagic Response to Pathogens
Source: Research Square preprint supplement (doi:10.21203/rs.3.rs-8252764/v1), 2025-12-11
Supplement: Supplementary file 3 [file ccf59adcc913cf5dca0264b5.xlsx]

## Sheet: PeptideGroups
Confidence	Annotated Sequence	Modifications	# Protein Groups	# PSMs	Master Protein Accessions
High	[R].SVPGEPFIGEDPVPH.[G]		1	1	Arhgef2-207 peptide
High	[R].EKEKMKEAKDA.[R]	1xOxidation [M5]	2	1	Q60875; Arhgef2-207 peptide
High	[R].EKEKMKEAKDA.[R]		2	1	Q60875; Arhgef2-207 peptide
High	[I].SVSGMTMCYACNK.[S]	2xCarbamidomethyl [C8; C11]; 2xOxidation [M5; M7]	2	2	Q60875; Arhgef2-207 peptide
High	[A].ALLRNNTALQSV.[S]		2	1	Q60875; Arhgef2-207 peptide
High	[T].SAIYPSDSFR.[Q]		2	1	Q60875; Arhgef2-207 peptide
High	[A].IYPSDSFRQSLLGSR.[R]		2	1	Q60875; Arhgef2-207 peptide
High	[T].NIAGHFNDESPLGLR.[Q]		2	1	Q60875; Arhgef2-207 peptide
High	[A].GHFNDESPLGLRQI.[L]		2	1	Q60875; Arhgef2-207 peptide
High	[A].GHFNDESPLGLR.[Q]		2	1	Q60875; Arhgef2-207 peptide
High	[H].FNDESPLGLRQILSQSTDSLNMR.[N]	1xOxidation [M22]	2	1	Q60875; Arhgef2-207 peptide
High	[R].QILSQSTDSLNMR.[N]		2	1	Q60875; Arhgef2-207 peptide
High	[A].VDSSFLQQHKK.[E-]		2	1	Q60875; Arhgef2-207 peptide
High	[K].EVMKKQDVIYELIQT.[E]	1xOxidation [M3]	2	1	Q60875; Arhgef2-207 peptide
High	[K].EVMKKQDVIYELI.[Q]	1xOxidation [M3]	2	1	Q60875; Arhgef2-207 peptide
High	[K].KQDVIYELIQTELH.[H]		2	1	Q60875; Arhgef2-207 peptide
High	[R].LFRTGMLEELQMEPEVV.[Q]	2xOxidation [M6; M12]	2	1	Q60875; Arhgef2-207 peptide
High	[R].TGMLEELQMEPEVV.[Q]		2	1	Q60875; Arhgef2-207 peptide
High	[T].GMLEELQMEPEVV.[Q]	1xOxidation [M8]	2	1	Q60875; Arhgef2-207 peptide
High	[T].GMLEELQMEPEVV.[Q]		2	1	Q60875; Arhgef2-207 peptide
High	[V].QGLFPCVDELSDIHTR.[F]	1xCarbamidomethyl [C6]	2	2	Q60875; Arhgef2-207 peptide
High	[V].QGLFPCVDELSDIHTRFL.[N]	1xCarbamidomethyl [C6]	2	2	Q60875; Arhgef2-207 peptide
High	[R].FLNQLLERR.[R]		2	1	Q60875; Arhgef2-207 peptide
High	[S].QFSGSNAEQMR.[K]		2	1	Q60875; Arhgef2-207 peptide
High	[S].QFSGSNAEQMRK.[T]	1xOxidation [M10]	2	1	Q60875; Arhgef2-207 peptide
High	[R].DKRFQQFIR.[K]		2	1	Q60875; Arhgef2-207 peptide
High	[I].NRILQNSHGVEEEYQDLA.[S]		2	3	Q60875; Arhgef2-207 peptide
High	[I].NRILQNSHGVEEEY.[Q]		2	1	Q60875; Arhgef2-207 peptide
High	[R].ILQNSHGVEEEYQDLA.[S]		2	2	Q60875; Arhgef2-207 peptide
High	[R].ILQNSHGVEEEYQ.[D]		2	1	Q60875; Arhgef2-207 peptide
High	[R].ILQNSHGVEEEY.[Q]		2	1	Q60875; Arhgef2-207 peptide
High	[I].LQNSHGVEEEYQDLA.[S]		2	2	Q60875; Arhgef2-207 peptide
High	[A].SALGLVKELLSNVDQDVH.[E]		2	2	Q60875; Arhgef2-207 peptide
High	[A].SALGLVKELLS.[N]		2	2	Q60875; Arhgef2-207 peptide
High	[K].ELLSNVDQDVHELEKEA.[R]		2	2	Q60875; Arhgef2-207 peptide
High	[K].ELLSNVDQDVHELEKEAR.[L]		2	1	Q60875; Arhgef2-207 peptide
High	[L].LSNVDQDVHELEKEAR.[L]		2	1	Q60875; Arhgef2-207 peptide
High	[L].LSNVDQDVHELEKEA.[R]		2	1	Q60875; Arhgef2-207 peptide
High	[S].NVDQDVHELEKEA.[R]		2	1	Q60875; Arhgef2-207 peptide
High	[S].NVDQDVHELEKEARLQEI.[Y]		2	1	Q60875; Arhgef2-207 peptide
High	[G].KGPFGRDELLR.[R]		2	1	Q60875; Arhgef2-207 peptide
High	[R].KLIHEGCLLWK.[T]	1xCarbamidomethyl [C7]	2	1	Q60875; Arhgef2-207 peptide
High	[R].KLIHEGCLLWKT.[A]	1xCarbamidomethyl [C7]	2	1	Q60875; Arhgef2-207 peptide
High	[K].LIHEGCLLWKT.[A]	1xCarbamidomethyl [C6]	2	1	Q60875; Arhgef2-207 peptide
High	[T].ATGRFKDVLLLL.[M]		2	1	Q60875; Arhgef2-207 peptide
High	[T].ATGRFKDVLLL.[L]		2	1	Q60875; Arhgef2-207 peptide
High	[A].TGRFKDVLLLL.[M]		2	1	Q60875; Arhgef2-207 peptide
High	[L].LMTDVLVFLQEKDQKYI.[F]		2	1	Q60875; Arhgef2-207 peptide
High	[L].MTDVLVFLQEKDQKYI.[F]	1xOxidation [M1]	2	1	Q60875; Arhgef2-207 peptide
High	[L].VFLQEKDQKYI.[F]		2	2	Q60875; Arhgef2-207 peptide
High	[L].VFLQEKDQKYIFT.[S]		2	1	Q60875; Arhgef2-207 peptide
High	[V].SLQNLIVRDIANQAK.[G]		2	2	Q60875; Arhgef2-207 peptide
High	[V].SLQNLIVRDIANQA.[K]		2	4	Q60875; Arhgef2-207 peptide
High	[V].SLQNLIVRDI.[A]		2	1	Q60875; Arhgef2-207 peptide
High	[V].SLQNLIVR.[D]		2	2	Q60875; Arhgef2-207 peptide
High	[V].SLQNLIVRDIA.[N]		2	1	Q60875; Arhgef2-207 peptide
High	[I].SSGPPEMYEVH.[A]		2	1	Q60875; Arhgef2-207 peptide
High	[S].SGPPEMYEVH.[A]		2	1	Q60875; Arhgef2-207 peptide
High	[R].VIQQSVR.[L]		2	1	Q60875; Arhgef2-207 peptide
High	[V].RLCPSREDFPLIETEDKA.[Y]	1xCarbamidomethyl [C3]	2	3	Q60875; Arhgef2-207 peptide
High	[R].LCPSREDFPLIETEDKA.[Y]	1xCarbamidomethyl [C2]	2	3	Q60875; Arhgef2-207 peptide
High	[S].REDFPLIETEDKA.[Y]		2	3	Q60875; Arhgef2-207 peptide
High	[K].LQQKNQALVELLQKNVELF.[A]		2	1	Q60875; Arhgef2-207 peptide
High	[K].NQALVELLQKNVELF.[A]		2	3	Q60875; Arhgef2-207 peptide
High	[K].NQALVELLQK.[N]		2	1	Q60875; Arhgef2-207 peptide
High	[N].QALVELLQKNVELF.[A]		2	2	Q60875; Arhgef2-207 peptide
High	[V].ELLQKNVELFAEMV.[H]		2	1	Q60875; Arhgef2-207 peptide
High	[L].QKNVELFAEMV.[H]	1xOxidation [M10]	2	1	Q60875; Arhgef2-207 peptide
High	[L].QKNVELFAEMV.[H]		2	1	Q60875; Arhgef2-207 peptide
High	[A].GFVGMPPPALPR.[G]	1xOxidation [M5]	2	1	Q60875; Arhgef2-207 peptide
High	[A].GFVGMPPPALPR.[G]		2	3	Q60875; Arhgef2-207 peptide
High	[R].LLKDALREVEGLKDLLLGPC.[V]	1xCarbamidomethyl [C20]	2	2	Q60875; Arhgef2-207 peptide
High	[R].LLKDALREVEGL.[K]		2	1	Q60875; Arhgef2-207 peptide
High	[R].EVEGLKDLLLGPC.[V]	1xCarbamidomethyl [C13]	2	1	Q60875; Arhgef2-207 peptide
High	[S].REPALPLDSDSGSCPGVT.[A]	1xCarbamidomethyl [C14]	2	2	Q60875; Arhgef2-207 peptide
High	[S].REPALPLDSDSGSCPGVTA.[N]	1xCarbamidomethyl [C14]	2	2	Q60875; Arhgef2-207 peptide
High	[R].TFNGSIELCRA.[D]	1xCarbamidomethyl [C9]	2	3	Q60875; Arhgef2-207 peptide
High	[T].FNGSIELCRA.[D]	1xCarbamidomethyl [C8]	2	1	Q60875; Arhgef2-207 peptide
High	[A].DSDSSQKDRNGNQLRSPQEEVLQPL.[I]		2	2	Q60875; Arhgef2-207 peptide
High	[A].DSDSSQKDRNGNQLR.[S]		2	1	Q60875; Arhgef2-207 peptide
High	[R].NGNQLRSPQEEVLQPL.[I]		2	1	Q60875; Arhgef2-207 peptide
High	[R].SPQEEVLQPL.[I]		2	1	Q60875; Arhgef2-207 peptide
High	[L].INLYGLLHGLQAVV.[V]		2	1	Q60875; Arhgef2-207 peptide
High	[L].INLYGLLHGLQAV.[V]		2	3	Q60875; Arhgef2-207 peptide
High	[L].INLYGLLHGLQ.[A]		2	1	Q60875; Arhgef2-207 peptide
High	[L].INLYGLLH.[G]		2	2	Q60875; Arhgef2-207 peptide
High	[L].INLYGLLHGL.[Q]		2	2	Q60875; Arhgef2-207 peptide
High	[L].INLYGLLHGLQAVVV.[Q]		2	1	Q60875; Arhgef2-207 peptide
High	[N].LYGLLHGLQAV.[V]		2	2	Q60875; Arhgef2-207 peptide
High	[V].VVQQERLMEA.[L]	1xOxidation [M8]	2	1	Q60875; Arhgef2-207 peptide
High	[A].LFPEGPERWEK.[L]		2	1	Q60875; Arhgef2-207 peptide
High	[A].LFPEGPERWEKLS.[R]		2	1	Q60875; Arhgef2-207 peptide
High	[A].LFPEGPERWEKL.[S]		2	1	Q60875; Arhgef2-207 peptide
High	[A].SVTPEKQATEL.[A]		2	2	Q60875; Arhgef2-207 peptide
High	[R].QHTLLQEELRR.[C]		2	3	Q60875; Arhgef2-207 peptide
High	[R].LGEERATEAGSL.[E]		2	1	Q60875; Arhgef2-207 peptide
High	[R].LGEERATEAGSLEA.[R]		2	2	Q60875; Arhgef2-207 peptide
High	[A].RALLEREAEEI.[R]		2	1	Q60875; Arhgef2-207 peptide
High	[R].ALLEREAEEI.[R]		2	1	Q60875; Arhgef2-207 peptide
High	[A].LLEREAEEI.[R]		2	1	Q60875; Arhgef2-207 peptide
High	[R].MQDIPEETESRDGEPT.[A]		2	2	Q60875; Arhgef2-207 peptide
High	[R].MQDIPEETESRDGEPT.[A]	1xOxidation [M1]	2	1	Q60875; Arhgef2-207 peptide
