# Supplementary material for: ARHGEF2 Isoform Switching Couples Intestinal Epithelial Barrier Function with Autophagic Response to Pathogens
Source: Research Square preprint supplement (doi:10.21203/rs.3.rs-8252764/v1), 2025-12-11
Supplement: Supplementary file 4 [file e4e53f15f53fc77f44129bf2.xlsx]

## Sheet: promoters analyzed_3vs3.tsv
promoter	chrom	start	end	strand	n_ctrl	n_lm	Ctrl_mean	Ctrl_sd	Ctrl_se	Lm_mean	Lm_sd	Lm_se	t_stat	p_value	fold_change_Lm_over_Ctrl	log2FC_Lm_over_Ctrl
P1	chr1	155988600	155990400	+	3	3	0.2888992577791214	0.0398537	0.0230095	0.24476916094621023	0.0458044	0.0264452	-1.25892	0.2777327819619829	0.8472474556722523	-0.239145
P2	chr1	155977000	155980000	+	3	3	0.31163325409094494	0.0957734	0.0552948	0.6333228747049967	0.0864365	0.049904162472807156	4.31888	0.012743909937230747	2.032269872867618	1.023091995808595
CXCL8	chr4	73740443	73740668	+	3	3	0.20722751319408417	0.0592668	0.034217675239779526	0.8045395215352377	0.2220718286632696	0.12821323005817117	4.501196366047486	0.035743	3.8823972080354436	1.9569477277237977
PHLDA1	chr12	76031388	76031920	+	3	3	1.1882320443789165	0.4920624025835498	0.2840923605897065	3.9487794240315757	1.3075410877231397	0.7549091989734509	3.4224679366768433	0.0531866	3.323239295210512	1.7325901803557926
